# Supplementary material for: Estrogen Receptor α Promotes Breast Cancer by Reprogramming Choline Metabolism
Source: Oxford University Press journal article supplement (doi:10.1158/0008-5472.can-15-2910), 2016-07-25
Supplement: 00085472can152910-sup-157167_3_supp_3545397_98wryk.xlsx [file 00085472can152910-sup-157167_3_supp_3545397_98wryk.xlsx]

## Sheet: Sheet1
Supplementary table 4
	E2/EtOH	Choline	PCho	GPC	Pcho/GPC
MCF7	Fold change	0.936252	0.904018	0.716246	1.33731
	p-value	0.62366	0.0444022	0.000392485	0.000610899
		Choline	PCho	GPC	Pcho/GPC
T47D	Fold change	1.43206	0.508762	0.982142	0.520867
	p-value	0.00114377	0.00749278	0.705786	0.0129538
