# Supplementary material for: Estrogen Receptor α Promotes Breast Cancer by Reprogramming Choline Metabolism
Source: Oxford University Press journal article supplement (doi:10.1158/0008-5472.can-15-2910), 2016-07-25
Supplement: 00085472can152910-sup-157167_3_supp_3545401_v8wrzt.xlsx [file 00085472can152910-sup-157167_3_supp_3545401_v8wrzt.xlsx]

## Sheet: Sheet1
Supplementary table 5
	Microarray		RT-PCR
	Fold change	p-value	fold change	p-value
MCF7	1.2	0.15	1.05	0.55
T47D	1.03	0.49	1.02	0.69
